# Supplementary material for: Distinct roles of mitochondria- and ER-localized Bcl-xL in apoptosis resistance and Ca2+ homeostasis
Source: PubMed Central journal article supplement — Mol Biol Cell. 2012 Jul 1;23(13):2605–18. doi: 10.1091/mbc.E12-02-0090 (PMC3386223; doi:10.1091/mbc.e12-02-0090), 2012-07-01
Supplement: supp_E12-02-0090v1_CombinedSupMats.pdf [file supp_E12-02-0090v1_CombinedSupMats.pdf]

## SUPPLEMENTARY FIGURE AND TABLE LEGEND

**Supplementary Figure 1. Generation of mitochondrially targeted and ER-targeted Bcl-x<sub>L</sub> mutants.** (A) Scheme of the Bcl-x<sub>L</sub> mutants. The C-terminal transmembrane domain of Bcl-x<sub>L</sub> was deleted ( $\Delta$ C) or replaced with the mitochondria-targeting sequence of ActA or the ER-targeting sequence of cb5. (B) The indicated GFP and Bcl-x<sub>L</sub> fusion proteins were transiently expressed in Bcl-x-KO MEFs. The mitochondrial protein Tom20 was detected as organelle marker. The fluorescence was visualized by confocal microscopy. Scale bar, 10  $\mu$ m. (C) Confocal microscopy images of GFP-tagged Bcl-x<sub>L</sub> proteins expressed in Bcl-x-KO MEF cells. The ER protein calreticulin was used as organelle marker. Scale bar, 10  $\mu$ m. (D) Intracellular localization of GFP-tagged Bcl-x<sub>L</sub> mutants in live cells. The indicated fusion proteins of GFP and Bcl-x<sub>L</sub> were transiently expressed in Bcl-x-KO MEFs and imaged using confocal microscopy. The ER or mitochondria were visualized by co-transfection with plasmids carrying either ER-targeted DsRed or mitochondrial-targeted RFP. Scale bar, 20  $\mu$ m.

**Supplementary Figure 2. Bcl-x<sub>L</sub> localized on mitochondria protects against apoptotic insults more effectively than ER-targeted Bcl-x<sub>L</sub>.** (A) Viability of the indicated MEF cells was measured in the presence of the following death stimuli: 5.0  $\mu$ M etoposide, 1.0  $\mu$ M doxorubicin, 0.2  $\mu$ g/ $\mu$ l actinomycin D, 5.0 nM staurosporine and 0.4 mM H<sub>2</sub>O<sub>2</sub>. Mean  $\pm$  standard deviation of triplicate experiments were shown. Experiments were performed independently three times. (B) Caspase 3/7 activity was measured 7 hours following actinomycin D treatment, 9 hours following H<sub>2</sub>O<sub>2</sub> treatment or 12 hours after the treatment with etoposide, doxorubicin, or staurosporine using fluorometric assay. Values are normalized to the values of untreated cells. Data shows mean  $\pm$  standard deviation of triplicate experiments, which have been repeated three times.

**Supplementary Figure 3. All three subtypes of InsP<sub>3</sub>R are expressed in wild type and Bcl-x-KO MEFs.** Western blot analysis for the three different InsP<sub>3</sub>R subtypes was performed on two wild type and two Bcl-x-KO MEF cell lines as indicated in Figure 1C.

**Supplementary Table 1. Lack of Bcl-x<sub>L</sub> expression does not alter the expression of BH3-only Bcl-2 proteins.** mRNA levels of BH3-only Bcl-2 proteins in two wild-type (WT) and two Bcl-x knock-out (KO) cell lines were determined by microarray analysis. Data are shown as fold-changes in mean mRNA value of triplicate RNA samples for each cell line. Negative numbers indicate down-regulation.

# Eno et al., Supplementary Figure 1

**A**

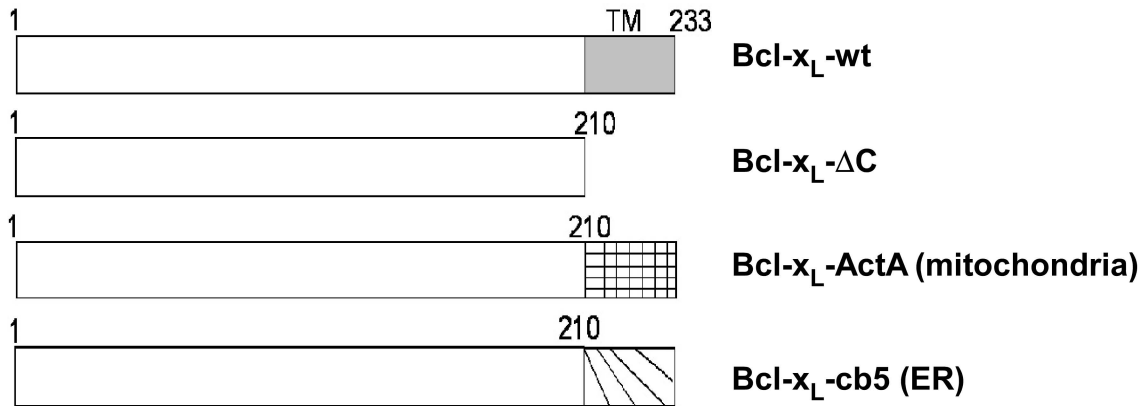

**B**

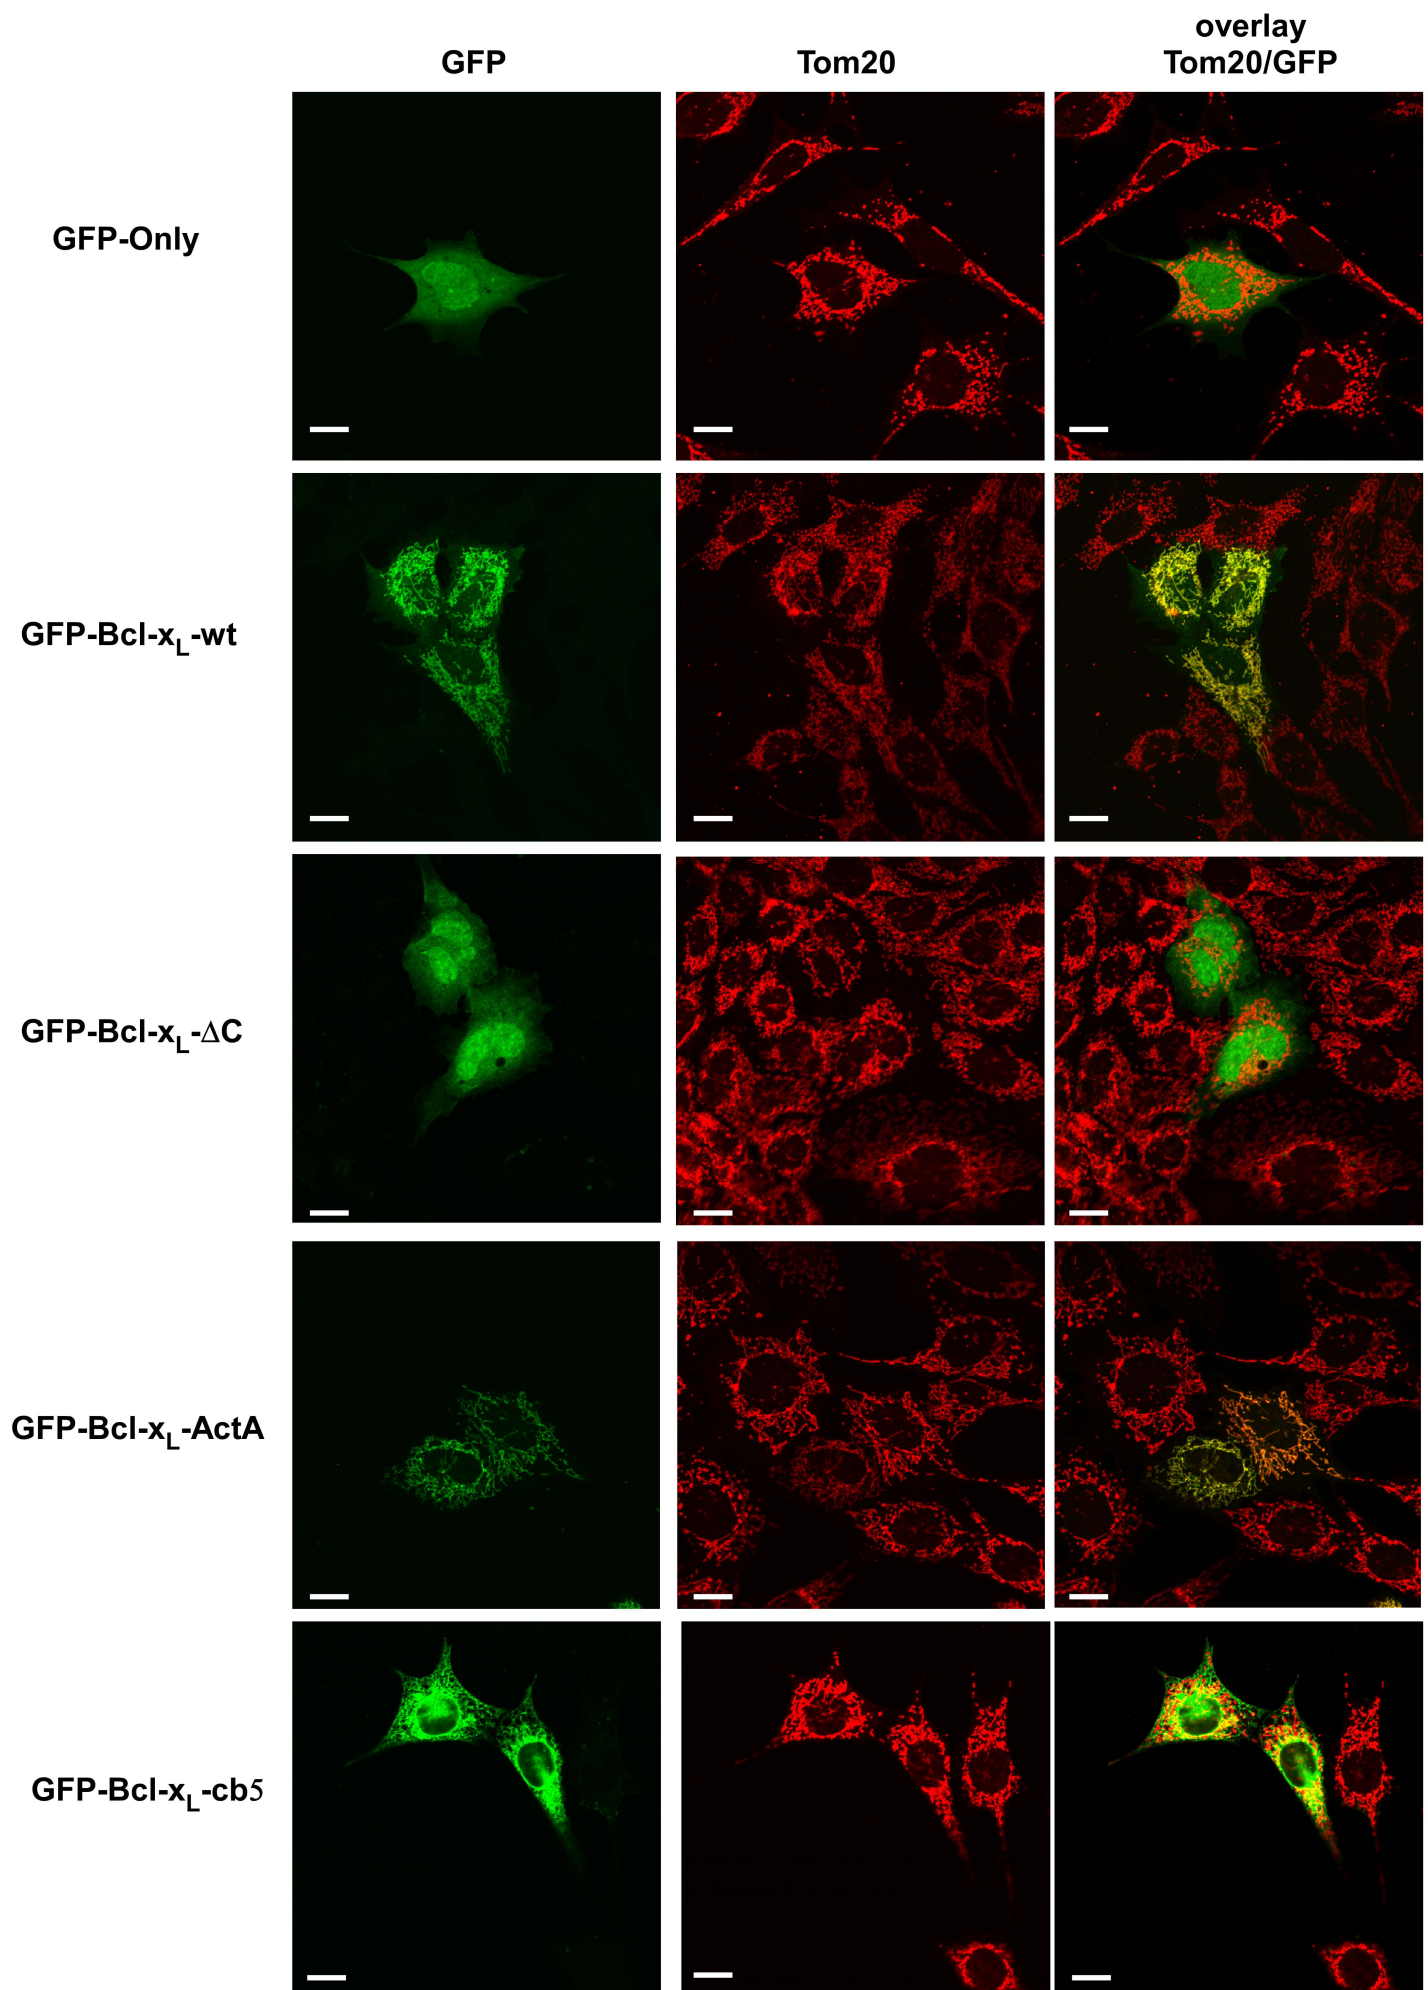

C

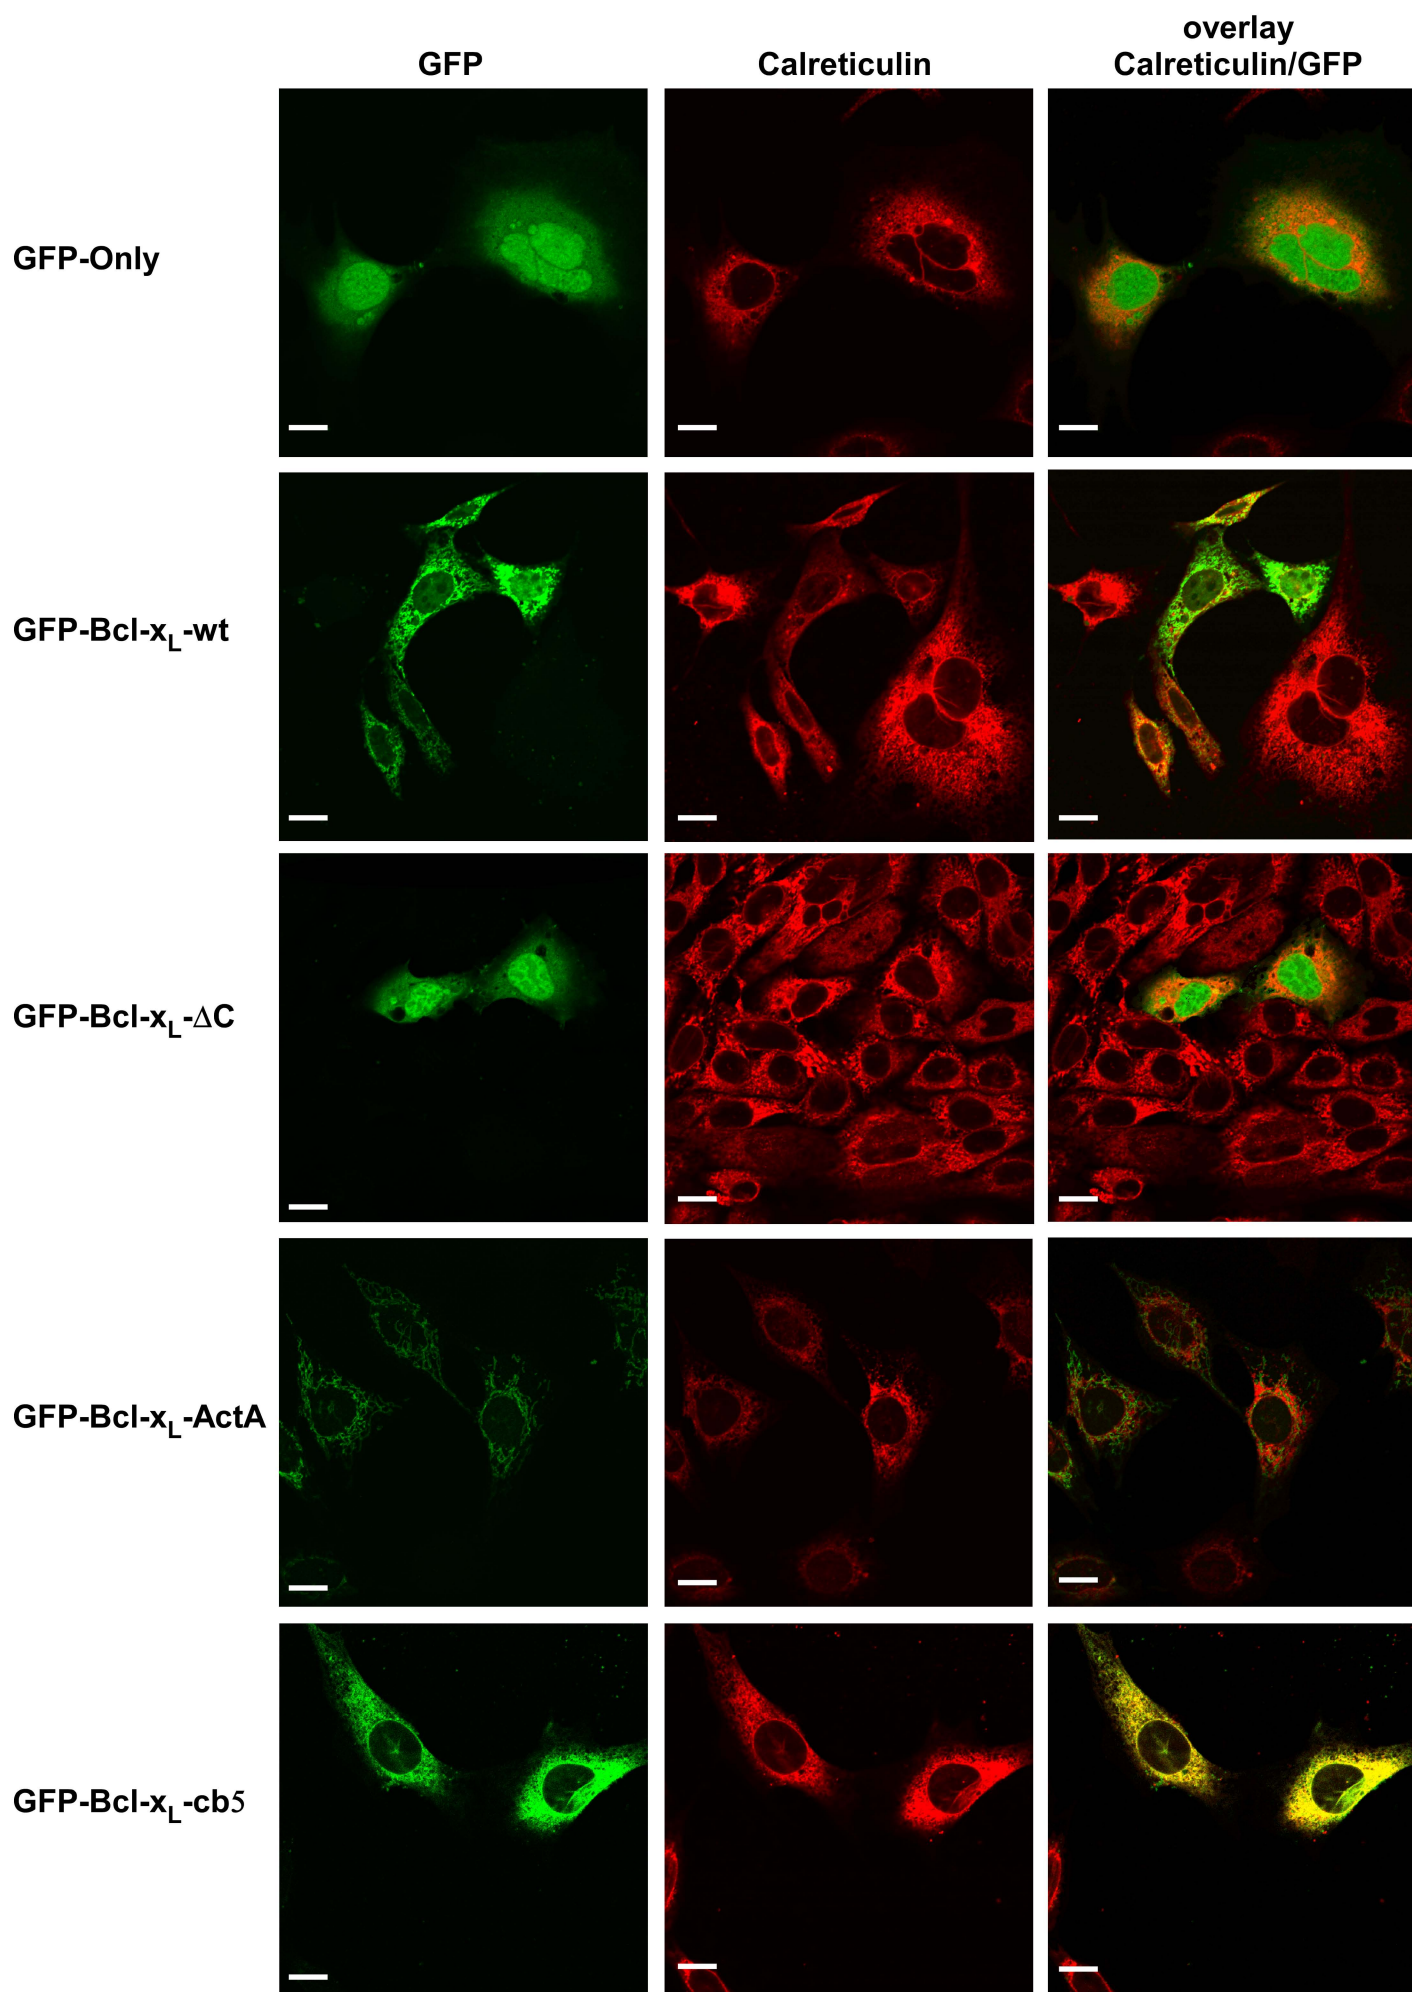

# Eno et al., Supplementary Figure 1

D

GFP-Bcl-x<sub>L</sub>-ActA and RFP-mito

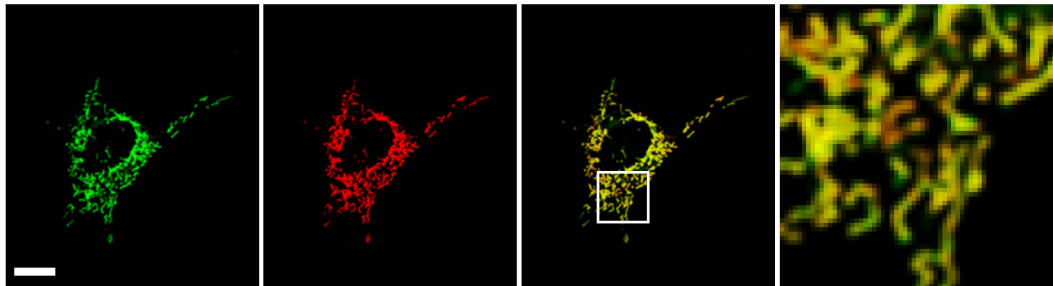

GFP-Bcl-x<sub>L</sub>-cb5 and DsRed-ER

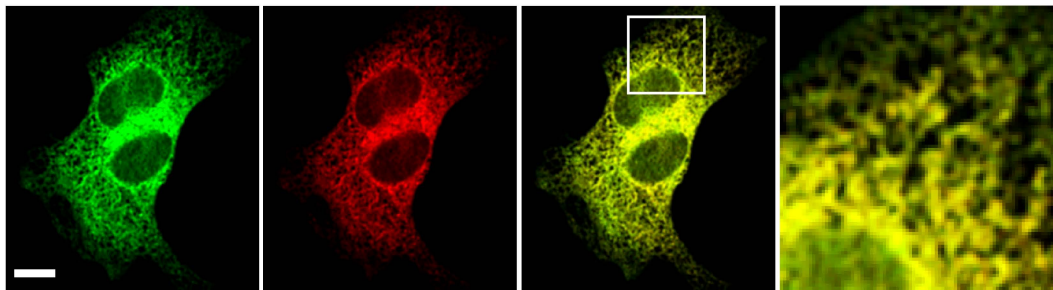

**A**

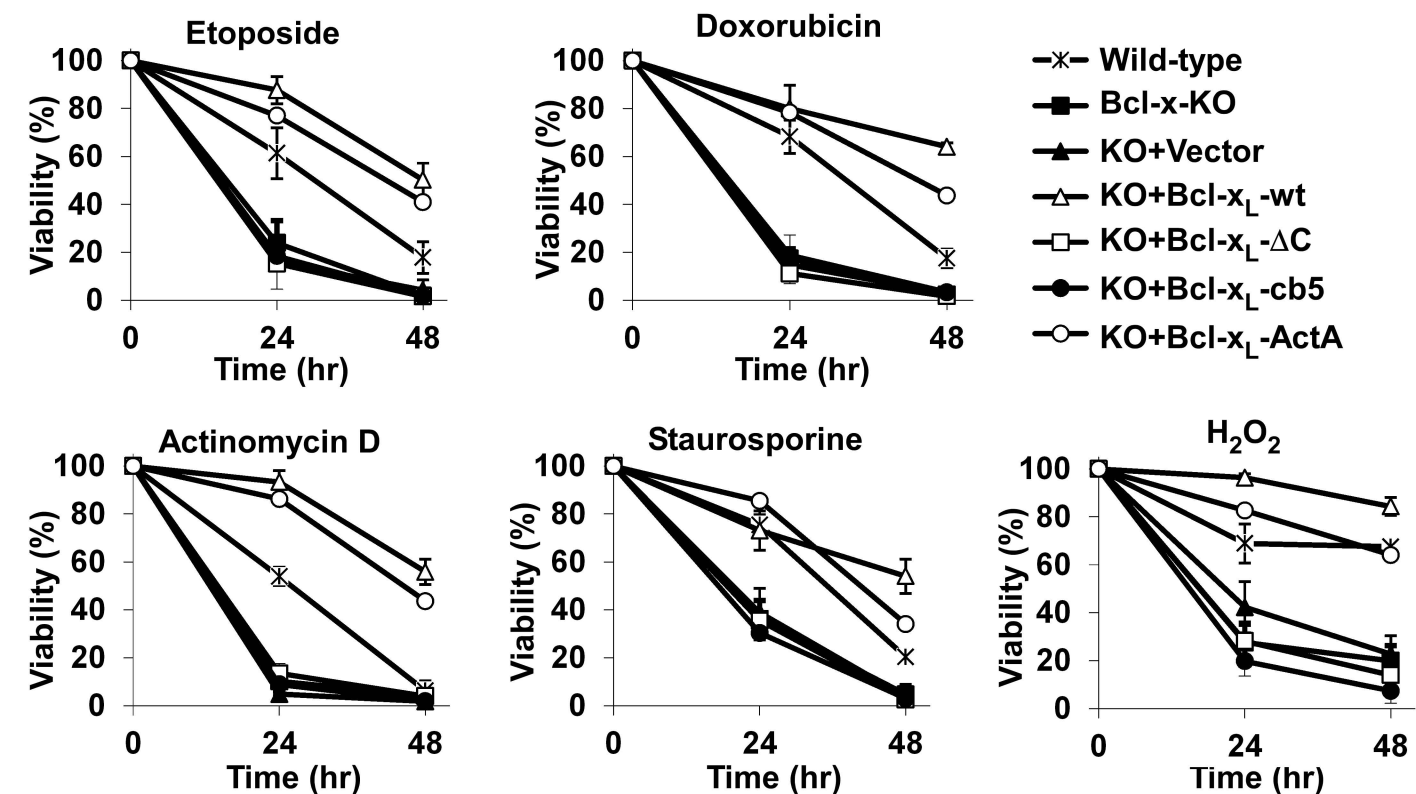

**B**

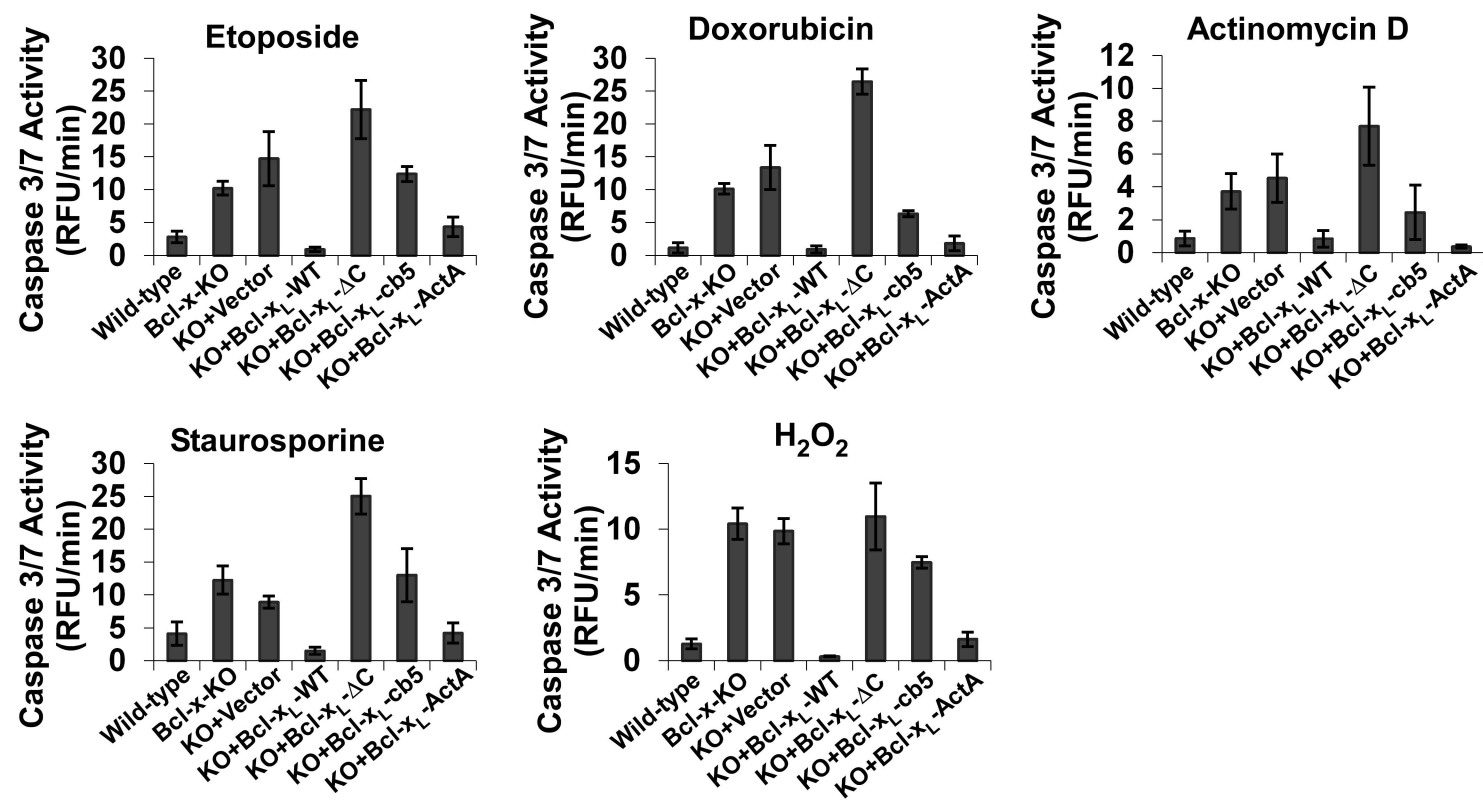

# Eno et al., Supplementary Figure 3

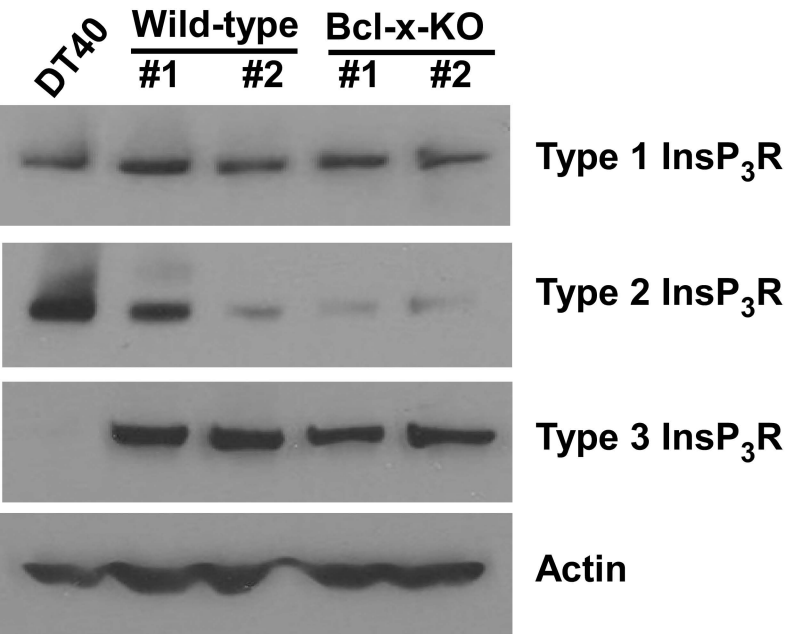

# Eno et al., Supplementary Table 1

| Gene Description                                                  | Fold changes<br>(KO/WT) | p value  |
|-------------------------------------------------------------------|-------------------------|----------|
| Bcl-2-interacting killer (Bik )                                   | 1.29                    | 0.001245 |
| Harakiri, Bcl-2 interactin protein (Hrk)                          | 1.12                    | 0.497068 |
| Bcl-2 modifying factor (Bmf)                                      | 1.09                    | 0.086236 |
| Bcl-2 binding component 3 (Puma)                                  | 1.05                    | 0.045677 |
| Bcl-2-like 11 (Bim)                                               | -1.37                   | 0.000303 |
| Bcl-2 associated agonist of cell<br>death (Bad)                   | 1.02                    | 0.610081 |
| Bcl-2 /adenovirus E1B Interacting<br>protein 3 (Bnip3)            | 1.12                    | 0.497.68 |
| Phorbol-12-myristate-13-acetate-induced<br>protein1(Pmaip1, Noxa) | 1.43                    | 0.071210 |
| BH3 interacting domain death<br>agonist (Bid)                     | 1.33                    | 0.011095 |
| Bcl-2 /adenovirus E1B Interacting<br>protein 3-like (Bnip3l, Nix) | 1.04                    | 0.381809 |
